# Supplementary material
Source: publisher figshare collection journal article supplement (https://sage.figshare.com/ndownloader/files/15084791)
Supplement: Supplementary file 1 [file 15084791]

Appendix 4: Robustness checks

*Table 1: Fixed effects models*

|  | **Model 1** | **Model 2** | **Model 3** | **Model 4** |
| --- | --- | --- | --- | --- |
| **With** | **Country fixed effects** | **Country fixed effects** | **Party fixed effects** | **Party fixed effects** |
| Intercept | -0.02 | -0.04 | 0.03 | 0.02 |
|  | (0.05) | (0.05) | (0.09) | (0.09) |
| Unemployment | -0.11*** | -0.10*** | -0.08*** | -0.07*** |
|  | (0.03) | (0.03) | (0.03) | (0.02) |
| Immigration | 0.15*** | 0.14*** | 0.10** | 0.09** |
|  | (0.04) | (0.05) | (0.04) | (0.04) |
| CHES position | 0.05** | 0.05** | -0.01 | 0.00 |
|  | (0.02) | (0.02) | (0.09) | (0.09) |
| Previous Attention | 0.33*** | 0.31*** | 0.30*** | 0.23*** |
|  | (0.05) | (0.05) | (0.06) | (0.06) |
| Size of RRPP | - | 0.06** | - | 0.09*** |
|  | - | (0.02) | - | (0.02) |
| Denmark | 0.13*** | 0.12*** | - | - |
|  | (0.03) | (0.04) | - | - |
| France | 0.04 | 0.03 | - | - |
|  | (0.04) | (0.04) | - | - |
| Germany | 0.01 | 0.02 | - | - |
|  | (0.02) | (0.02) | - | - |
| Netherlands | 0.05 | 0.05 | - | - |
|  | (0.04) | (0.04) | - | - |
| Sweden | -0.00 | 0.01 | - | - |
|  | (0.03) | (0.03) | - | - |
| United Kingdom | 0.03 | 0.05 | - | - |
|  | (0.04) | (0.04) | - | - |
| Party fixed effects | - | - | Included | Included |
| R-squareda | 0.40 | 0.42 | 0.51 | 0.54 |
| N (observations) | 322 | 322 | 322 | 322 |

*Table 2: Models excluding specific countries*

|  | **Model 5** | **Model 6** | **Model 7** | **Model 8** | **Model 9** | **Model 10** | **Model 11** |
| --- | --- | --- | --- | --- | --- | --- | --- |
| **Without** | **Belgium** | **Denmark** | **France** | **Germany** | **Netherlands** | **Sweden** | **UK** |
| Intercept | 0.04 | 0.04*** | 0.03 | 0.03 | 0.03 | 0.05 | 0.02 |
|  | (0.03) | (0.01) | (0.03) | (0.03) | (0.03) | (0.03) | (0.04) |
| Unemployment | -0.10*** | -0.04*** | -0.11*** | -0.12*** | -0.13*** | -0.12*** | -0.11*** |
|  | (0.03) | (0.01) | (0.02) | (0.03) | (0.03) | (0.03) | (0.03) |
| Immigration | 0.13*** | 0.04** | 0.12*** | 0.14*** | 0.13*** | 0.10*** | 0.14*** |
|  | (0.04) | (0.02) | (0.04) | (0.04) | (0.04) | (0.04) | (0.04) |
| CHES position | 0.04 | 0.02 | 0.06** | 0.06** | 0.08** | 0.06** | 0.05** |
|  | (0.03) | (0.02) | (0.03) | (0.03) | (0.03) | (0.03) | (0.03) |
| Previous Attention | 0.33*** | 0.34*** | 0.33*** | 0.32*** | 0.32*** | 0.34*** | 0.32*** |
|  | (0.05) | (0.05) | (0.05) | (0.05) | (0.05) | (0.05) | (0.05) |
| REML | -421 | -760 | -561 | -495 | -402 | -483 | -547 |
| R-squared | 0.44 | 0.39 | 0.45 | 0.46 | 0.46 | 0.43 | 0.45 |
| N (observations) | 254 | 254 | 311 | 284 | 244 | 281 | 304 |
| N (party) | 45 | 48 | 50 | 52 | 40 | 51 | 54 |
| N (country) | 6 | 6 | 6 | 6 | 6 | 6 | 6 |

*Table 3: Models excluding specific countries (continued)*

|  | **Model 12** | **Model 13** | **Model 14** | **Model 15** | **Model 16** | **Model 17** | **Model 18** |
| --- | --- | --- | --- | --- | --- | --- | --- |
| **Without** | **Belgium** | **Denmark** | **France** | **Germany** | **Netherlands** | **Sweden** | **UK** |
| Intercept | 0.03 | 0.04*** | 0.02 | 0.02 | 0.02 | 0.03 | 0.01 |
|  | (0.03) | (0.01) | (0.03) | (0.03) | (0.03) | (0.03) | (0.03) |
| Unemployment | -0.09*** | -0.04*** | -0.10*** | -0.11*** | -0.12*** | -0.10*** | -0.10*** |
|  | (0.03) | (0.01) | (0.02) | (0.03) | (0.03) | (0.03) | (0.03) |
| Immigration | 0.10** | 0.03* | 0.09*** | 0.11*** | 0.10** | 0.08** | 0.12*** |
|  | (0.04) | (0.02) | (0.03) | (0.04) | (0.04) | (0.03) | (0.04) |
| CHES position | 0.04 | 0.03 | 0.06** | 0.06** | 0.08** | 0.06** | 0.06** |
|  | (0.03) | (0.02) | (0.03) | (0.03) | (0.03) | (0.03) | (0.03) |
| Previous Attention | 0.30*** | 0.24*** | 0.30*** | 0.29*** | 0.29*** | 0.31*** | 0.29*** |
|  | (0.05) | (0.05) | (0.05) | (0.05) | (0.06) | (0.05) | (0.05) |
| Size of RRPP | 0.08*** | 0.06**** | 0.07*** | 0.06*** | 0.07*** | 0.06** | 0.06*** |
|  | (0.03) | (0.01) | (0.02) | (0.02) | (0.03) | (0.02) | (0.02) |
| REML | -422 | -779 | -564 | -496 | -402 | -484 | -548 |
| R-squared | 0.46 | 0.49 | 0.47 | 0.47 | 0.47 | 0.44 | 0.47 |
| N (observations) | 254 | 254 | 311 | 284 | 244 | 281 | 304 |
| N (party) | 45 | 48 | 50 | 52 | 40 | 51 | 54 |
| N (country) | 6 | 6 | 6 | 6 | 6 | 6 | 6 |
